# Supplementary material for: Optimal gap-affine alignment in O(s) space
Source: PubMed Central journal article supplement (PMC9940620; doi:10.1093/bioinformatics/btad074), 2023-02-07
Supplement: btad074_supplementary_data.pdf [file btad074_supplementary_data.pdf]

# Supplementary material for Optimal gap-affine alignment in $O(s)$ space

Santiago Marco-Sola, Jordan M. Eizenga, Andrea Guarracino, Benedict Paten,  
Erik Garrison, and Miquel Moreto

## 1 Proof of the correctness lemma

In order to reason about the properties of the WFA dynamic programming structures, it is helpful to invoke certain properties of the Needleman-Wunsch dynamic programming matrices. Accordingly, we will provide the recursions here to introduce the notation.

$$\begin{aligned} D_{i,j} &= \min\{M_{i-1,j} + o + e, D_{i-1,j} + e\} \\ I_{i,j} &= \min\{M_{i,j-1} + o + e, I_{i,j-1} + e\} \\ M_{i,j} &= \min\{I_{i,j}, D_{i,j}, M_{i-1,j-1} + x \cdot \mathbb{I}(q[i-1] \neq t[j-1])\}, \end{aligned} \tag{1}$$

where  $\mathbb{I}$  is the indicator function that evaluates to 1 if its argument is true and 0 otherwise. The base case of the recursion is  $M_{0,0} = 0$ . We also adopt the convention that  $D_{0,j} = I_{i,0} = \infty$  for all  $i$  and  $j$ . An optimal alignment can be identified with a *traceback path* through these matrices: a sequence of cells that indicate which of the options from the recursion achieved the minimum score.

Before proving the correctness lemma, we prove two useful properties of the Needleman-Wunsch matrices.

**Lemma 1.**  *$M$  is monotonically non-decreasing along each diagonal.*

*Proof.* Choose integers  $i$  and  $j$  such that  $0 \leq i < m$  and  $0 \leq j < n$ , and we will show that  $M_{i,j} \leq M_{i+1,j+1}$ , which is sufficient to prove the claim.  $M_{i+1,j+1}$  corresponds to the score of an optimal alignment of  $q_{0:i}$  and  $t_{0:j}$ . Any traceback path of this alignment must include a coordinate  $(i, y)$  with  $y \leq j$  or  $(x, j)$  with  $x \leq i$ . Without loss of generality, assume that there is an optimal alignment path that includes  $(i, y)$ , and choose  $y$  to be the maximal such value within this path. We consider two cases:

1.  $y = j$ . Then  $(i, j)$  is on the traceback path from  $M_{i+1,j+1}$  and hence  $M_{i,j} \leq M_{i+1,j+1}$ .
2.  $y < j$ . Then there must be at least  $j - y$  horizontal transitions on the traceback path following  $(i, y)$  for it to end in diagonal  $i - j$ . Moreover, since  $y$  is chosen to be maximal,  $(i, y + 1)$  is not on the traceback path, and there must therefore be at least one gap opened after  $(i, y)$ . This implies  $M_{i+1,j+1} \geq M_{i,y} + o + (j - y)e$ . We also have  $M_{i,j} \leq M_{i,y} + o + (j - y)e$ , since it is possible to reach  $(i, j)$  by taking  $j - y$  horizontal transitions starting from  $(i, y)$ .

□

**Lemma 2.**  *$D$  and  $I$  are monotonically non-decreasing along each diagonal, excluding the boundaries  $D_{0,\cdot}$  and  $I_{\cdot,0}$ .*

*Proof.* The proofs for  $I$  and  $D$  are essentially identical, so we will prove the claim only for  $I$ . The argument will be proved by induction on decreasing values for the diagonal  $k$ . The base case  $k = m - 1$  is trivially true because there is only one cell in  $I$  in this diagonal (excluding the boundary). Consider  $i$  and  $j$  such that  $0 \leq i < m$  and  $0 < j < n$ , and assume that the induction hypothesis holds for all diagonals  $k > i - j$ . We will show that  $I_{i,j} \leq I_{i+1,j+1}$ , which is sufficient to prove the induction claim for  $k = i - j$ . Consider two cases.

1.  $I_{i+1,j+1} = M_{i+1,j} + o + e$ . Then, by Lemma 1, we have

$$I_{i,j} \leq M_{i,j-1} + o + e \leq M_{i+1,j} + o + e = I_{i+1,j+1}. \quad (2)$$

2.  $I_{i+1,j+1} = I_{i+1,j} + e$ . Then, by the induction hypothesis, we have

$$I_{i,j} \leq I_{i,j-1} + e \leq I_{i+1,j} + e = I_{i+1,j+1}. \quad (3)$$

□

We are now equipped to prove the central lemma that demonstrates correctness.

**Lemma 2.1 (from main text).** *The optimal alignment score  $s_{opt} \leq s$  if and only if there exist  $s_f$ ,  $s_r$ , and  $k$  such that  $|s_f - s_r| \leq p$  and at least one of the following is true:*

1.  $s_f + s_r = s$  and  $\overrightarrow{\mathcal{M}}_{k,s_f} \geq \overleftarrow{\mathcal{M}}_{k,s_r}$
2.  $s_f + s_r = s + o$  and  $\overrightarrow{\mathcal{I}}_{k,s_f} \geq \overleftarrow{\mathcal{I}}_{k,s_r}$
3.  $s_f + s_r = s + o$  and  $\overrightarrow{\mathcal{D}}_{k,s_f} \geq \overleftarrow{\mathcal{D}}_{k,s_r}$ ,

and further,  $\overleftarrow{\mathcal{M}}_{k,s_r}$  (resp.  $\overleftarrow{\mathcal{I}}_{k,s_r}$ ,  $\overleftarrow{\mathcal{D}}_{k,s_r}$ ) is included in the traceback of an alignment with score at most  $s$  if the first (resp. second, third) condition is true.

*Proof.* ( $\Rightarrow$ ) Let  $(i, j)$  be a coordinate along some optimal traceback path where the dynamic programming value has the minimum difference from  $s_{opt}/2$ . If there are ties, choose the first among the coordinates that achieve the minimum. We consider three exhaustive cases. In each of them, our goal will be to produce the values  $s_f$ ,  $s_r$ , and  $k$  as required by the claim.

1. *The path is in  $M$  at  $(i, j)$ .* Then the path up to  $(i, j)$  and the path after  $(i, j)$  correspond to partial alignments in the forward and reverse direction respectively, and their scores are  $s_f = M_{i,j}$  and  $s_r = s_{opt} - M_{i,j}$ . Taking  $k = i - j$ , we know that the f.r. points in the  $k$ -th diagonal must be at least as far as this coordinate in their respective directions:  $\overrightarrow{\mathcal{M}}_{k,s_f} \geq i \geq \overleftarrow{\mathcal{M}}_{k,s_r}$ .

Because adjacent positions in an optimal traceback path can differ by at most  $p$ , we have both  $|s_f - s_{opt}/2| \leq p/2$  and  $|s_r - s_{opt}/2| \leq p/2$ . These imply  $|s_f - s_r| \leq p$  by the triangle inequality.

2. *The path is in  $I$  at  $(i, j)$  and not also in  $M$  at  $(i, j)$ .* Then  $(i, j)$  is part of a gap that begins at  $(i, j')$  for some  $j' < j$  and ends at  $(i, j' + \ell)$  where  $j' + \ell > j$ , else the path is also in  $M$  at  $(i, j)$ . Consider the quantity  $x = (s_{opt} - 2M_{i,j'})/2e$  across three cases.

- 2.1.  $x \leq 1/2$ . Let  $s_f = M_{i,j'}$  and  $s_r = s_{opt} - M_{i,j'} + o$ . These correspond to the scores of the partial alignments before and after  $(i, j')$ , respectively. Therefore we take  $k = i - j'$ , and, as previously, the f.r. points within this diagonal must obey the inequality  $\overrightarrow{\mathcal{M}}_{k,s_f} \geq i \geq \overleftarrow{\mathcal{M}}_{k,s_r}$ .

Note that  $M_{i,j'} \leq s_{opt}/2$  else  $I_{i,j'}$  would not achieve the minimum difference from  $s_{opt}/2$ . This implies  $x \geq 0$ , and in particular  $|x| \leq 1/2$ . Therefore,

$$|s_f - s_r| = |s_{opt} - 2M_{i,j'} + o| \leq |o + 2ex| \leq o + 2e|x| \leq o + e \leq p. \quad (4)$$

2.2.  $1/2 < x < \ell - 1/2$ . Let  $x^*$  be the nearest integer to  $x$ , and let  $s_f = I_{i,j'+x^*}$  and  $s_r = s_{opt} - I_{i,j'+x^*} + o$ . These correspond to the scores of the partial alignments before and after  $(i, j' + x^*)$ , respectively. Therefore we take  $k = i - j' - x^*$ , and, as previously, the f.r. points within this diagonal must obey the inequality  $\overrightarrow{\mathcal{I}}_{k,s_f} \geq i \geq \overleftarrow{\mathcal{I}}_{k,s_r}$ . Noting that  $|x - x^*| \leq 1/2$  by construction, we also have

$$|s_f - s_r| = |s_{opt} - 2M_{i,j'} - 2x^*e| \leq 2e|x - x^*| \leq e \leq p. \quad (5)$$

2.3.  $x \geq \ell - 1/2$ . Let  $s_f = I_{i,j'+\ell}$  and  $s_r = s_{opt} - I_{i,j'+\ell} + o$ . These correspond to the scores of the partial alignments before and after  $(i, j' + \ell)$ , respectively. Therefore we take  $k = i - j' - \ell$ , and, as previously, the f.r. points within this diagonal must obey the inequality  $\overrightarrow{\mathcal{I}}_{k,s_f} \geq i \geq \overleftarrow{\mathcal{I}}_{k,s_r}$ . Noting that  $s_{opt}/2 \leq I_{i,j'+\ell}$  else  $j \geq j' + \ell$ , and also that  $I_{i,j'+\ell} = M_{i,j'} + o + \ell e$ , we can obtain

$$\begin{aligned} s_{opt} &\leq 2M_{i,j'} + 2o + 2\ell e \\ s_{opt} - M_{i,j'} - \ell e &\leq M_{i,j'} + 2o + \ell e \\ s_r &\leq s_f + o. \end{aligned} \quad (6)$$

Since  $x \geq \ell - 1/2$ , we also have

$$\begin{aligned} s_{opt} - 2M_{i,j'} &\geq (2\ell - 1)e \\ s_{opt} - M_{i,j'} - \ell e &\geq M_{i,j'} + (\ell - 1)e \\ s_r &\geq s_f - o - e. \end{aligned} \quad (7)$$

These together imply  $|s_f - s_r| \leq o + e \leq p$ .

3. *The path is in  $D$  at  $(i, j)$  and not also in  $M$  at  $(i, j)$ .* Same as the previous case.

( $\Leftarrow$ ) We consider the three conditions separately.

1. Let  $(i_1, j_1)$  be the coordinates in  $M$  corresponding to  $\overrightarrow{\mathcal{M}}_{k,s_f}$  and likewise  $(i_2, j_2)$  for  $\overleftarrow{\mathcal{M}}_{k,s_r}$ . The partial alignments corresponding  $M_{i_2,j_2}$  and  $\overleftarrow{\mathcal{M}}_{k,s_r}$  can be concatenated into a full alignment with score  $M_{i_2,j_2} + s_r$ . By Lemma 1, this score is at most  $M_{i_1,j_1} + s_r = s_f + s_r = s$ .
2. Let  $(i_1, j_1)$  be the coordinates in  $I$  corresponding to  $\overrightarrow{\mathcal{I}}_{k,s_f}$  and likewise  $(i_2, j_2)$  for  $\overleftarrow{\mathcal{I}}_{k,s_r}$ . The partial alignments corresponding  $I_{i_2,j_2}$  and  $\overleftarrow{\mathcal{I}}_{k,s_r}$  can be concatenated into a full alignment with score  $I_{i_2,j_2} + s_r - o$ . By Lemma 2, this score is at most  $I_{i_1,j_1} + s_r - o = s_f + s_r - o = s$ .
3. Same as the previous condition.

□

## 2 Complementary evaluation on simulated data (short sequences)

|             | Time (ms) |     |     |     |     |      |       |     |     |      |      |       |        |      |      |       |       |        |
|-------------|-----------|-----|-----|-----|-----|------|-------|-----|-----|------|------|-------|--------|------|------|-------|-------|--------|
|             | 100 bp    |     |     |     |     |      | 1 Kbp |     |     |      |      |       | 10 Kbp |      |      |       |       |        |
|             | 0.1%      | 1%  | 5%  | 10% | 20% | 40%  | 0.1%  | 1%  | 5%  | 10%  | 20%  | 40%   | 0.1%   | 1%   | 5%   | 10%   | 20%   | 40%    |
| edlib       | 115       | 116 | 117 | 120 | 123 | 126  | 99    | 102 | 103 | 122  | 144  | 179   | 273    | 314  | 361  | 431   | 575   | 848    |
| bitpal      | 25        | 24  | 24  | 24  | 24  | 25   | 128   | 128 | 130 | 129  | 130  | 132   | 1240   | 1238 | 1241 | 1252  | 1249  | 1247   |
| ksw2-extz2  | 127       | 128 | 148 | 163 | 174 | 176  | 887   | 890 | 897 | 908  | 912  | 917   | 9903   | 9862 | 9821 | 9830  | 9897  | 9853   |
| WFA-high    | 5         | 5   | 29  | 60  | 125 | 237  | 1     | 8   | 73  | 207  | 547  | 1311  | 1      | 28   | 612  | 1991  | 5664  | 13265  |
| WFA-med     | 7         | 7   | 43  | 113 | 288 | 626  | 1     | 15  | 219 | 688  | 2026 | 4802  | 2      | 91   | 1893 | 6627  | 20205 | 47362  |
| WFA-low     | 7         | 7   | 42  | 132 | 345 | 752  | 1     | 17  | 260 | 830  | 2429 | 5744  | 2      | 110  | 2294 | 7957  | 24080 | 56184  |
| wfalm       | 9         | 9   | 34  | 79  | 195 | 449  | 2     | 12  | 162 | 587  | 1730 | 4282  | 3      | 81   | 1797 | 6447  | 19181 | 45360  |
| wfalm-low   | 11        | 11  | 50  | 128 | 328 | 746  | 3     | 18  | 286 | 943  | 2828 | 6793  | 4      | 130  | 2789 | 10069 | 30354 | 76382  |
| wfalm-rec   | 9         | 9   | 91  | 163 | 455 | 1118 | 3     | 23  | 476 | 1706 | 5458 | 13730 | 4      | 236  | 6112 | 22254 | 70693 | 187436 |
| BiWFA       | 10        | 10  | 48  | 97  | 188 | 339  | 3     | 19  | 120 | 391  | 937  | 2145  | 3      | 53   | 774  | 2446  | 6911  | 15764  |
| BiWFA-score | 11        | 11  | 50  | 92  | 165 | 278  | 2     | 12  | 73  | 196  | 438  | 939   | 3      | 26   | 337  | 1094  | 3138  | 7464   |

  

|             | Memory (MB) |    |    |     |     |     |       |    |    |     |     |     |        |     |     |     |     |     |
|-------------|-------------|----|----|-----|-----|-----|-------|----|----|-----|-----|-----|--------|-----|-----|-----|-----|-----|
|             | 100 bp      |    |    |     |     |     | 1 Kbp |    |    |     |     |     | 10 Kbp |     |     |     |     |     |
|             | 0.1%        | 1% | 5% | 10% | 20% | 40% | 0.1%  | 1% | 5% | 10% | 20% | 40% | 0.1%   | 1%  | 5%  | 10% | 20% | 40% |
| edlib       | 4           | 4  | 4  | 4   | 4   | 4   | 4     | 4  | 4  | 5   | 4   | 4   | 4      | 4   | 4   | 4   | 4   | 4   |
| bitpal      | 4           | 4  | 4  | 4   | 4   | 4   | 4     | 4  | 4  | 4   | 4   | 4   | 4      | 4   | 4   | 4   | 4   | 4   |
| ksw2-extz2  | 4           | 4  | 4  | 4   | 4   | 4   | 6     | 6  | 6  | 6   | 6   | 6   | 193    | 193 | 195 | 193 | 196 | 195 |
| WFA-high    | 6           | 4  | 4  | 6   | 5   | 5   | 4     | 5  | 7  | 8   | 15  | 28  | 8      | 14  | 56  | 128 | 313 | 714 |
| WFA-med     | 4           | 6  | 6  | 4   | 4   | 4   | 4     | 4  | 4  | 4   | 5   | 9   | 6      | 5   | 16  | 35  | 81  | 176 |
| WFA-low     | 4           | 4  | 4  | 4   | 4   | 4   | 4     | 4  | 4  | 4   | 5   | 9   | 4      | 5   | 13  | 25  | 60  | 126 |
| wfalm       | 4           | 4  | 4  | 4   | 4   | 4   | 4     | 4  | 4  | 4   | 5   | 8   | 4      | 5   | 19  | 54  | 148 | 347 |
| wfalm-low   | 4           | 4  | 4  | 4   | 4   | 4   | 4     | 4  | 4  | 4   | 4   | 5   | 4      | 4   | 7   | 10  | 16  | 35  |
| wfalm-rec   | 4           | 4  | 4  | 4   | 4   | 4   | 4     | 4  | 4  | 4   | 4   | 4   | 4      | 4   | 5   | 6   | 7   | 9   |
| BiWFA       | 3           | 3  | 3  | 3   | 4   | 4   | 4     | 3  | 4  | 6   | 5   | 5   | 7      | 6   | 6   | 6   | 5   | 13  |
| BiWFA-score | 2           | 2  | 2  | 2   | 2   | 3   | 2     | 2  | 3  | 2   | 2   | 3   | 3      | 3   | 3   | 3   | 4   | 8   |

Table S1: Execution time (ms) and memory (MB) required per 1M bases aligned, using simulated sequences (100bp to 10Kbp).

### 3 Complementary evaluation on simulated data (long sequences)

|             | Time (seconds) |      |     |     |      |      |       |     |      |      |       |       |       |     |      |       |       |       |
|-------------|----------------|------|-----|-----|------|------|-------|-----|------|------|-------|-------|-------|-----|------|-------|-------|-------|
|             | 100 Kbp        |      |     |     |      |      | 1 Mbp |     |      |      |       |       | 2 Mbp |     |      |       |       |       |
|             | 0.1%           | 1%   | 5%  | 10% | 20%  | 40%  | 0.1%  | 1%  | 5%   | 10%  | 20%   | 40%   | 0.1%  | 1%  | 5%   | 10%   | 20%   | 40%   |
| edlib       | 0.46           | 0.6  | 1   | 2   | 4    | 5    | 0.7   | 2   | 9    | 17   | 35    | 67    | 0.9   | 4   | 18   | 35    | 69    | 135   |
| bitpal      | 12.3           | 12.3 | 12  | 12  | 12   | 12   | 122.9 | 123 | 122  | 123  | 123   | 124   | 247.3 | 249 | 249  | 248   | 247   | 248   |
| ksw2-extz2  | 97.6           | 97.0 | 97  | 96  | 97   | 96   | n/a   | n/a | n/a  | n/a  | n/a   | n/a   | n/a   | n/a | n/a  | n/a   | n/a   | n/a   |
| WFA-high    | 0.01           | 0.4  | 8   | 28  | 84   | 203  | 0.1   | 4   | 84   | 312  | n/a   | n/a   | 0.1   | 8   | n/a  | n/a   | n/a   | n/a   |
| WFA-med     | 0.01           | 0.9  | 25  | 89  | 272  | 576  | 0.1   | 12  | 457  | 1922 | 3690  | 6594  | 0.2   | 31  | n/a  | n/a   | n/a   | n/a   |
| WFA-low     | 0.02           | 1.1  | 26  | 101 | 301  | 635  | 0.1   | 14  | 901  | 4394 | 4857  | 7389  | 0.2   | 43  | 4670 | 7710  | 9813  | 14910 |
| wfalm       | 0.02           | 1.3  | 27  | 90  | 268  | 646  | 0.2   | 12  | 255  | 841  | n/a   | n/a   | 0.3   | 25  | n/a  | n/a   | n/a   | n/a   |
| wfalm-low   | 0.02           | 2.0  | 48  | 164 | 494  | 1208 | 0.2   | 23  | 466  | 1525 | 4418  | 10605 | 0.5   | 45  | 893  | 2990  | 8779  | 21147 |
| wfalm-rec   | 0.04           | 4.6  | 127 | 447 | 1402 | 3522 | 0.6   | 66  | 1618 | 5792 | 17752 | 44669 | 1.3   | 143 | 3421 | 11979 | 37747 | n/a   |
| BiWFA       | 0.02           | 0.4  | 6   | 20  | 61   | 147  | 0.1   | 3   | 61   | 218  | 680   | 1701  | 0.1   | 6   | 130  | 466   | 1429  | 3501  |
| BiWFA-score | 0.01           | 0.2  | 3   | 10  | 30   | 73   | 0.0   | 1   | 30   | 112  | 355   | 894   | 0.0   | 3   | 67   | 245   | 750   | 1791  |

  

|             | Memory (MB) |       |       |       |       |       |       |       |        |        |       |       |       |       |       |       |       |        |
|-------------|-------------|-------|-------|-------|-------|-------|-------|-------|--------|--------|-------|-------|-------|-------|-------|-------|-------|--------|
|             | 100 Kbp     |       |       |       |       |       | 1 Mbp |       |        |        |       |       | 2 Mbp |       |       |       |       |        |
|             | 0.1%        | 1%    | 5%    | 10%   | 20%   | 40%   | 0.1%  | 1%    | 5%     | 10%    | 20%   | 40%   | 0.1%  | 1%    | 5%    | 10%   | 20%   | 40%    |
| edlib       | 5           | 5     | 5     | 5     | 5     | 5     | 13    | 13    | 13     | 13     | 13    | 13    | 22    | 23    | 23    | 22    | 23    | 23     |
| bitpal      | 6           | 4     | 4     | 4     | 6     | 6     | 10    | 10    | 10     | 10     | 10    | 10    | 14    | 12    | 17    | 15    | 13    | 14     |
| ksw2-extz2  | 19081       | 19083 | 19067 | 19081 | 19083 | 19047 | n/a   | n/a   | n/a    | n/a    | n/a   | n/a   | n/a   | n/a   | n/a   | n/a   | n/a   | n/a    |
| WFA-high    | 10          | 131   | 2707  | 8981  | 26667 | 65123 | 149   | 12505 | 269893 | 932199 | n/a   | n/a   | 537   | 49356 | n/a   | n/a   | n/a   | n/a    |
| WFA-med     | 7           | 40    | 451   | 830   | 1620  | 1481  | 50    | 1303  | 17680  | 42464  | 24874 | 15265 | 151   | 4082  | n/a   | n/a   | n/a   | n/a    |
| WFA-low     | 7           | 30    | 308   | 554   | 884   | 960   | 39    | 828   | 10759  | 25321  | 12539 | 9852  | 114   | 2529  | 41819 | 52551 | 26067 | 19601  |
| wfalm       | 5           | 125   | 2704  | 8968  | 26575 | 64781 | 136   | 12483 | 264104 | 898770 | n/a   | n/a   | 515   | 49181 | n/a   | n/a   | n/a   | n/a    |
| wfalm-low   | 4           | 18    | 140   | 443   | 823   | 1426  | 20    | 535   | 4970   | 10435  | 30817 | 50766 | 58    | 1199  | 11658 | 36299 | 69312 | 958126 |
| wfalm-rec   | 4           | 7     | 22    | 43    | 73    | 121   | 9     | 52    | 249    | 497    | 904   | 1445  | 15    | 106   | 549   | 1064  | 1787  | n/a    |
| BiWFA       | 9           | 10    | 13    | 19    | 27    | 35    | 26    | 32    | 66     | 97     | 180   | 229   | 46    | 64    | 122   | 202   | 267   | 378    |
| BiWFA-score | 7           | 8     | 9     | 16    | 23    | 32    | 17    | 29    | 64     | 97     | 186   | 223   | 35    | 56    | 122   | 204   | 256   | 350    |

Table S2: Execution time (s) and memory (MB) required per 1M bases aligned, using simulated sequences (100Kbp to 2Mbp).

## 4 Complementary evaluation on real data (shorter sequences)

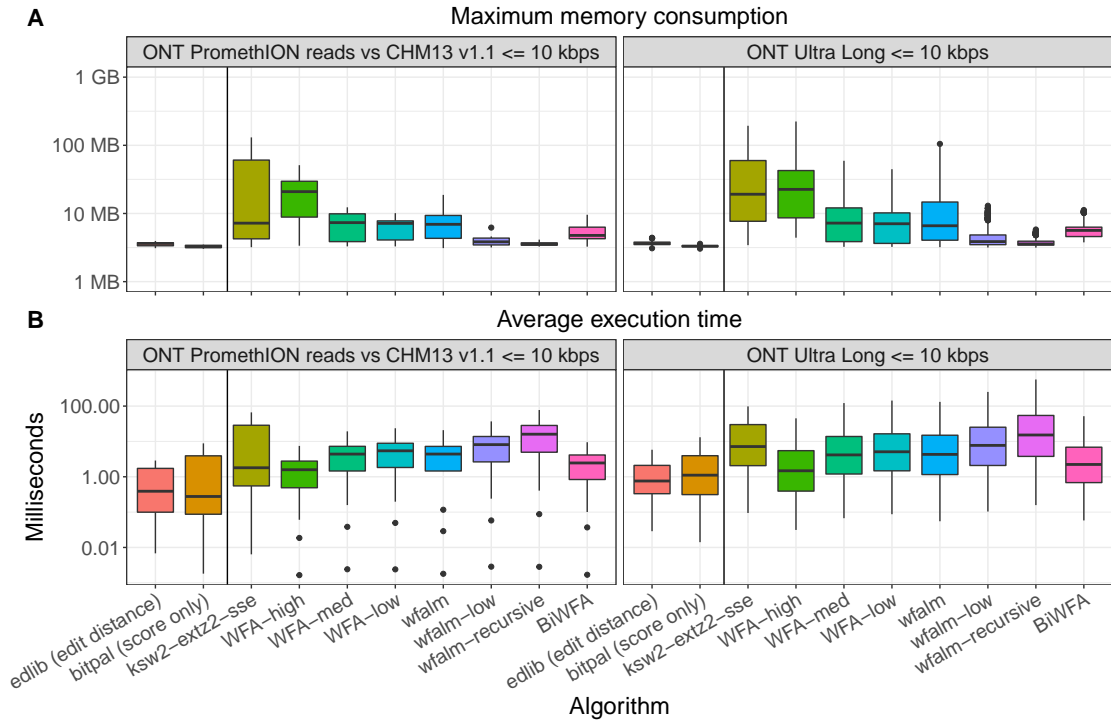

Figure S1: Experimental results from the execution of BiWFA and other state-of-the-art implementations aligning sequences up to 10Kbps. Figure shows (A) memory consumption and (B) execution time per sequence aligned. A vertical line on each panel separates algorithms that use simpler penalty models or can only compute the alignment score (i.e., edlib and bitpal) from those that compute the full gap-affine alignment.
